# Supplementary material for: Elegance as Complexity Reduction in Systems Design
Source: Hindawi journal article supplement (doi:10.1155/2018/5987249), 2018-01-01
Supplement: f2 [file 5987249.f2.pdf]

## Supplementary 2

# Elegance System Architecture

## SOCIO-DEMOGRAPHIC SURVEY

---

### 1 – ANAGRAPHIC

#### 1.1 Gender:

- ☐ Male
  - ☐ Female
- 

#### 1.2 Age:

- ☐ 34 or under
  - ☐ 35 to 44
  - ☐ 45 to 54
  - ☐ 55 to 64
  - ☐ 65 or older
-

## 2 – QUALIFICATION LEVEL

*What is your highest level of education completed?*

- ☐ BSc
- ☐ MSc
- ☐ MBA
- ☐ PhD
- ☐ Other

## 3 – PROFESSIONAL BACKGROUND

*Please indicate the main roles of your professional career:*

- ☐ Electrical/Electronics engineer
- ☐ Computer/Software engineer
- ☐ Mechanical engineer
- ☐ Aerospace/Aeronautics engineer
- ☐ Civil engineer
- ☐ System architect
- ☐ Chief engineer
- ☐ Technical manager
- ☐ Systems engineer (INCOSE definition)
- ☐ Verification and validation engineer
- ☐ Integration and test engineer

☐ Requirement analyst

☐ Other

#### **4– SYSTEM ENGINEERING EXPERIENCE**

##### **4.1 Which are specific fields of your professional activities?**

☐ Aerospace/Defense/Space

☐ Software

☐ Education

☐ Business consulting

☐ Commercial products

☐ Construction

☐ Service

☐ Other

---

##### **4.2 Indicate the number of years of professional practice as Systems Engineer:**

---

## 5 – SYSTEM ENGINEERING QUALIFICATION

*What is your professional certification in Systems Engineering?*

- ☐ INCOSE ASEP
- ☐ INCOSE CSEP
- ☐ INCOSE ESEP
- ☐ OMG OCSMP Model User
- ☐ OMG OCSMP Model Builder – Fundamental
- ☐ OMG OCSMP Model Builder – Intermediate
- ☐ OMG OCSMP Model Builder – Advanced
- ☐ Other

---

### Survey Elegance

Below is the link to start the Survey.

Clicking on it you will download a PowerPoint file containing some representations of the ATM's workflow. The Survey requires to rank the charts in order of perceived elegance.

To answer the question please use the file in a presentation mode to navigate across the several alternatives.

Select the link to start:

[Survey elegance](#)

---

Please select for each diagram its position in the ranking, where 1 is "the most elegant" and 8 is "the least elegant".

|  |   |   |   |   |   |   |   |   |
|--|---|---|---|---|---|---|---|---|
|  | 1 | 2 | 3 | 4 | 5 | 6 | 7 | 8 |
|--|---|---|---|---|---|---|---|---|

|   |                       |                       |                       |                       |                       |                       |                       |                       |
|---|-----------------------|-----------------------|-----------------------|-----------------------|-----------------------|-----------------------|-----------------------|-----------------------|
| A | <input type="radio"/> |
| B | <input type="radio"/> |
| C | <input type="radio"/> |
| D | <input type="radio"/> |
| E | <input type="radio"/> |
| F | <input type="radio"/> |
| G | <input type="radio"/> |
| H | <input type="radio"/> |

---

Survey Implementation Effectiveness

Clicking on it you will download a PowerPoint file containing some representations of the ATM's workflow .The Survey requires to rank the charts in order of perceived implementation effectiveness.

Select the link to start:

Please select for each chart its position in the ranking, where 1 is the diagram with "The highest implementation effectiveness" and 8 is the diagram with the "The lowest implementation effectiveness".

[illegible]
